# Supplementary material for: Controlling Pandemic Flu: The Value of International Air Travel Restrictions
Source: PLoS One. 2007 May 2;2(5):e401. doi: 10.1371/journal.pone.0000401 (PMC1855004; doi:10.1371/journal.pone.0000401)
Supplement: Text S2 — Modifications to the Travel Matrix to Account for Multiple Legs of Travel (0.16 MB DOC) [file pone.0000401.s003.doc]

**Text S2 – Modifications to the Travel Matrix to Account for Multiple Legs of Travel**

Let cities be indexed by , so that .

Let be the matrix with entry, , equal to the probability that a passenger from city travels to city , such that (a passenger has to travel somewhere), and (a passenger does not travel from a city to itself). Then is the one-leg travel probability matrix. Note that the probability of travel from city to city is not necessarily equal to the probability of travel from city to city , and so is not necessarily symmetric.

If there are total passengers leaving each city , then the number of travelers, , arriving in each city after one leg of travel is .

To properly account for a passenger who is taking a two-leg trip from city through city to city , we must ensure that that person does not return from city to city on the second leg of the trip, that is, that . Let be the probability of travel from city to city given that . Then , and for , . Thus we have that the total number of travelers arriving in city after two legs of travel is given by . We define as the matrix of two-leg travel probabilities, with the element equal to .

We account similarly for travelers who arrive in a given city after a three-leg journey. A passenger traveling from city through cities and to arrive in city cannot return to either city or city from city . Let be the probability of travel from city to city given that . Then , and for , . The total number of passengers arriving in city after three legs of travel is given by . We define as the matrix of three-leg travel probabilities, with the element equal to .

Now let be the probability that a person from city travels exactly one leg to reach his destination, let be the probability that he travels two legs, and let be the probability that he travels three or more legs. Then the total probability of travel from city to city will be given by . We define as the matrix with the element equal to . This matrix is used as the multileg travel matrix in our global epidemic model.

We calculated the elements of as follows:

Using a sample of U.S. travel itineraries, we fit the following model for the single-leg travel probabilities from each city : , where is the population of city , and is the number of available outbound seats on flights from city . We used this model to predict the probabilities of a single-leg trip for airports outside the United States, and collapsed the resulting distributions into three categories of airports, corresponding to small, medium, and large travel hubs. The three corresponding probabilities are for small hubs, for medium hubs, and for large hubs. Because the proportion of U.S. passengers traveling three or more legs to reach their destinations is less than 0.03, we set . Finally, we set , and calculated the elements of the matrix as described above.

**Figure S1**. **Screenshot of the Global Epidemic Model Interface.** A user can select one of three visualization screens: a world map view, time series plots, or numeric tables for each of the cities. Before running the model, one can choose to produce stochastic or deterministic runs and choose the types of intervention. Each spot on the map corresponds to a metropolitan area. Clicking on a spot will display the city name and a snapshot of the city disease status. Arrows link each infected city with its initial source of infection.
